# Supplementary material for: Structure and control of negative thermal expansion of Nd/Sm substituted 0.5PbTiO3–0.5BiFeO3 ferroelectrics
Source: Royal Society of Chemistry journal article supplement (doi:10.1039/c6ra03774g), 2016-01-01
Supplement: c6ra03774g1.pdf [file c6ra03774g1.pdf]

## Supplementary information:

### Structure and control of negative thermal expansion of Nd/Sm substituted 0.5PbTiO<sub>3</sub>-0.5BiFeO<sub>3</sub> ferroelectrics

X. Peng,<sup>a</sup> J. Chen,<sup>a</sup> K. Lin,<sup>a</sup> L. L. Fang,<sup>a</sup> Y. C. Rong,<sup>a</sup> J. X. Deng<sup>a</sup> and X. R. Xing<sup>a,\*</sup>

<sup>a</sup>Department of Physical Chemistry, and <sup>b</sup>Department of Chemistry, University of Science and Technology Beijing, Beijing, 100083, P. R. China. E-mail: xing@ustb.edu.cn; Fax: 86 10 6233 2525; Tel: 86 10 62334200

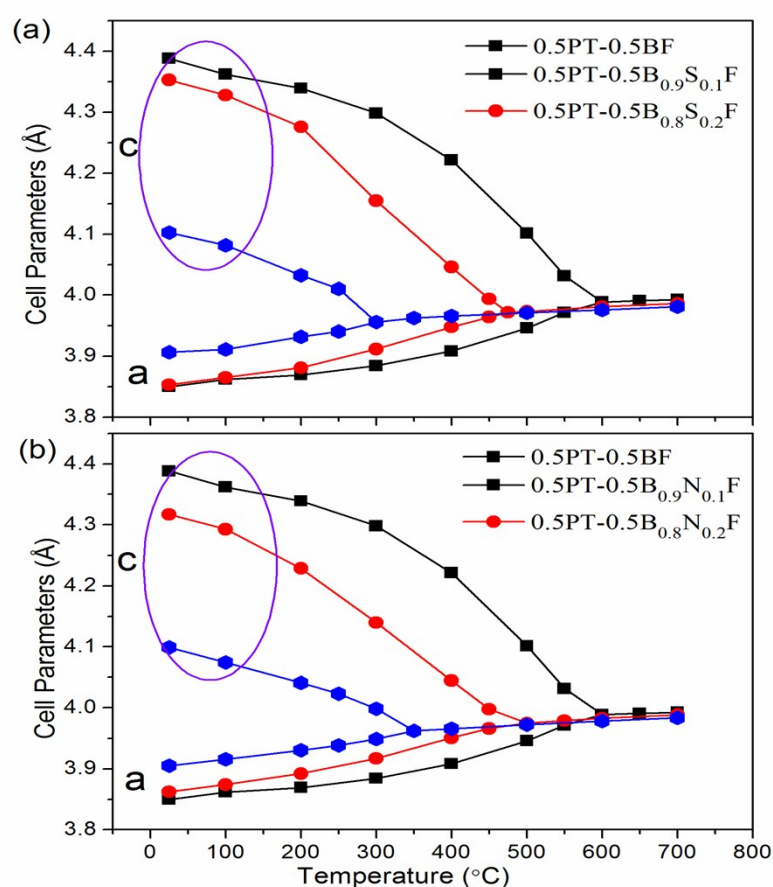

**Fig. S1** Temperature dependence of lattice constant of 0.5PT-0.5B<sub>1-x</sub>(N/S)<sub>x</sub>F,  $x = 0, 0.1,$  and 0.2.

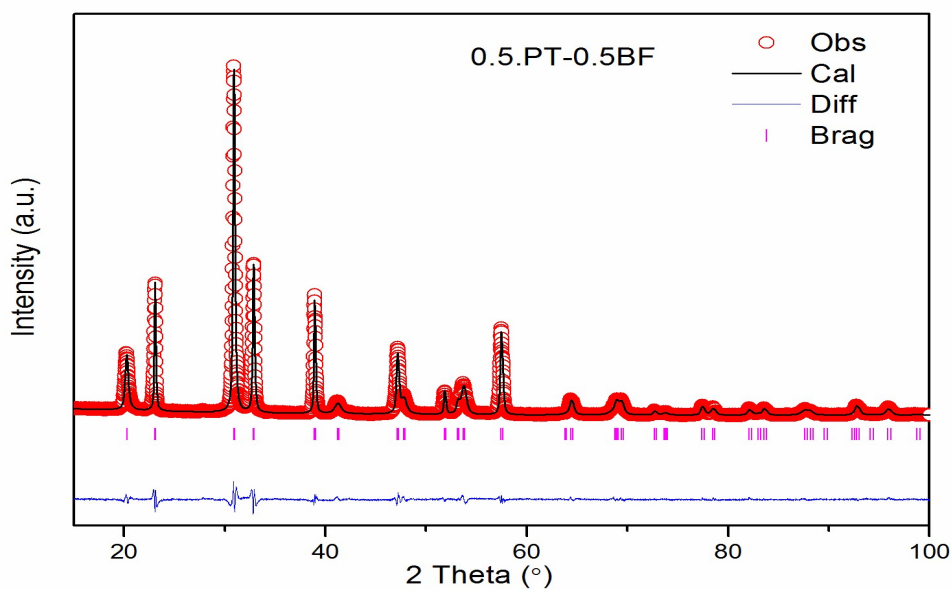

**Fig. S2** Observed (point), calculated (line) and difference profiles at room temperature after Rietveld refinement using space group  $P4mm$  for 0.5PT-0.5BF

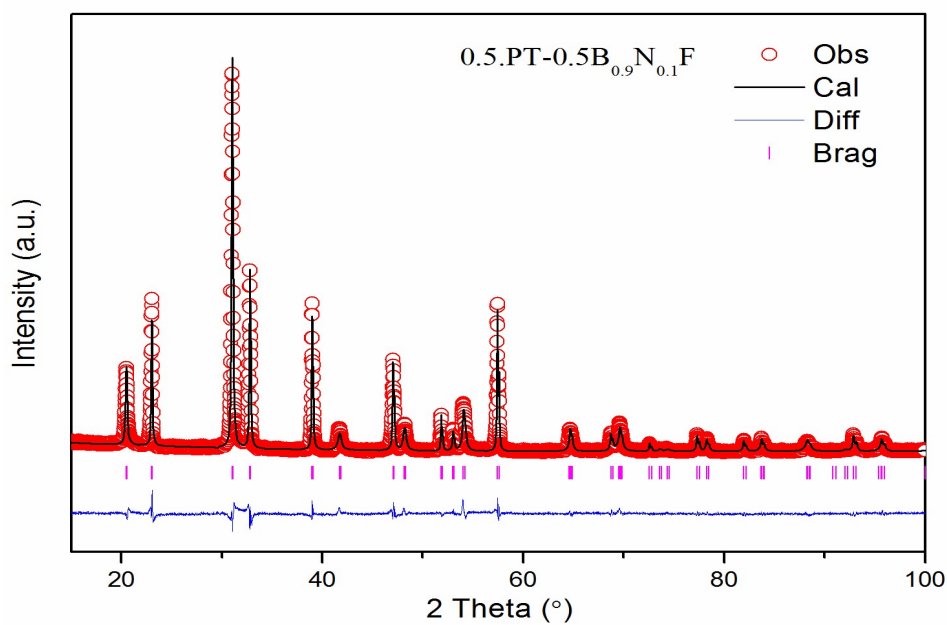

**Fig. S3** Observed (point), calculated (line) and difference profiles at room temperature after Rietveld refinement using  $P4mm$  space group for 0.5PT-0.5B<sub>0.9</sub>N<sub>0.1</sub>F.

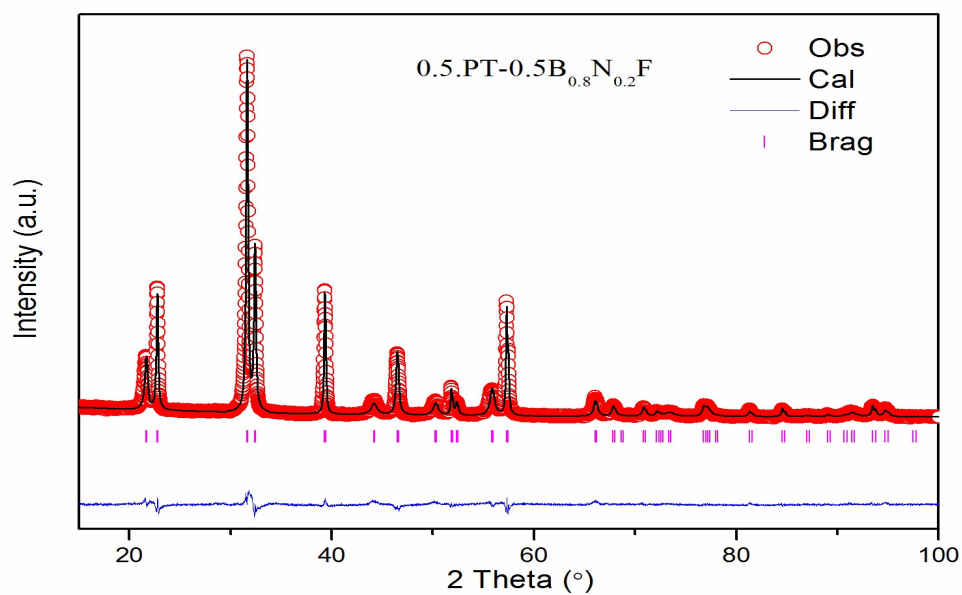

**Fig. S4** Observed (point), calculated (line) and difference profiles at room temperature after Rietveld refinement using  $P4mm$  space group for 0.5PT-0.5B<sub>0.8</sub>N<sub>0.2</sub>F.

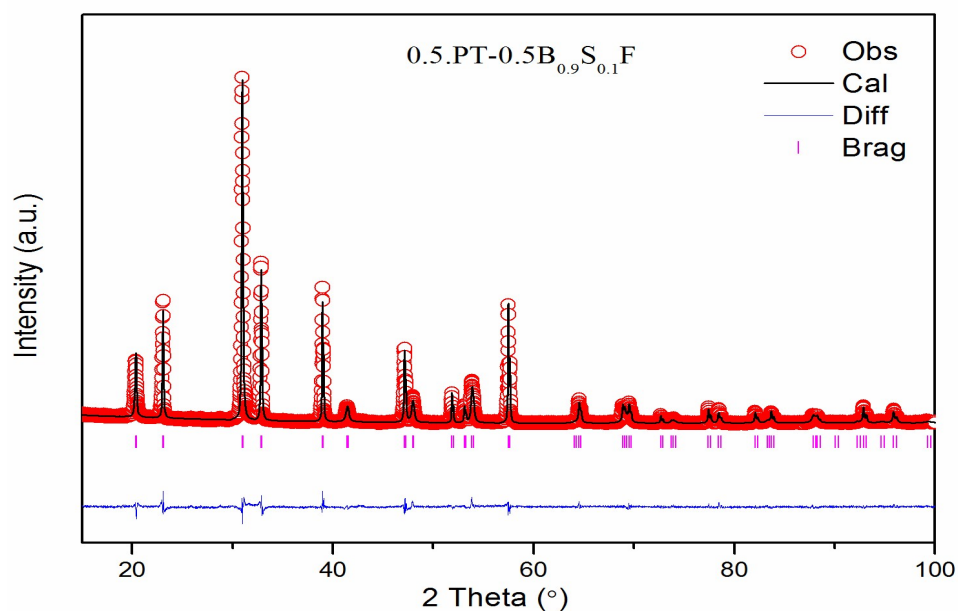

**Fig. S5** Observed (point), calculated (line) and difference profiles at room temperature after Rietveld refinement using  $P4mm$  space group for 0.5PT-0.5B<sub>0.9</sub>S<sub>0.1</sub>F.

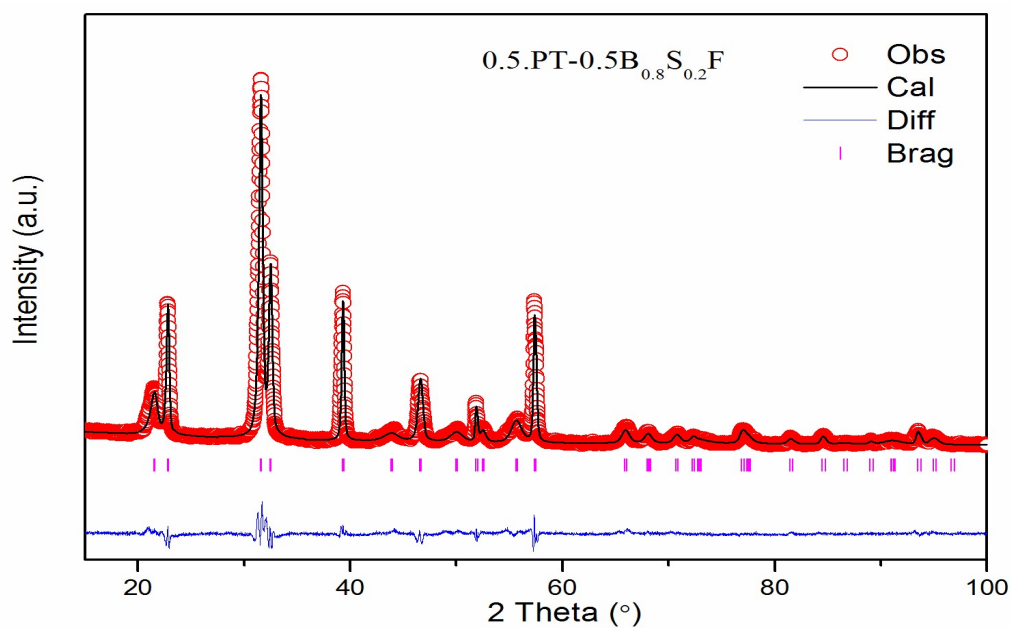

**Fig. S6** Observed (point), calculated (line) and difference profiles at room temperature after Rietveld refinement using  $P4mm$  space group for  $0.5PT-0.5B_{0.8}S_{0.2}F$ .

**Table. S1** Crystal structure at room temperature,  $T_c$ ,  $P_s$ , CTE and  $\omega_s$  of  $0.5PT-0.5B_{1-x}(N/S)_xF$ ,  $x = 0, 0.1$ , and  $0.2$ .

|                                   | <b>0.5PT-<br/>0.5BF</b> | <b>0.5PT-<br/>0.5B<sub>0.9</sub>N<sub>0.1</sub>F</b> | <b>0.5PT-<br/>0.5B<sub>0.8</sub>N<sub>0.2</sub>F</b> | <b>0.5PT-<br/>0.5B<sub>0.9</sub>S<sub>0.1</sub>F</b> | <b>0.5PT-0.5B<sub>0.8</sub>S<sub>0.2</sub>F</b> |
|-----------------------------------|-------------------------|------------------------------------------------------|------------------------------------------------------|------------------------------------------------------|-------------------------------------------------|
| $a/\text{\AA}$                    | 3.84974                 | 3.86227                                              | 3.90529                                              | 3.85307                                              | 3.90627                                         |
| $c/\text{\AA}$                    | 4.38816                 | 4.31711                                              | 4.09903                                              | 4.35266                                              | 4.10256                                         |
| $c/a$                             | 1.14                    | 1.12                                                 | 1.05                                                 | 1.13                                                 | 1.05                                            |
| $v/\text{\AA}^3$                  | 65.027                  | 64.400                                               | 62.516                                               | 64.620                                               | 62.60                                           |
| $\delta z_A/\text{\AA}$           | 0.690                   | 0.659                                                | 0.520                                                | 0.643                                                | 0.515                                           |
| $\delta z_B/\text{\AA}$           | 0.531                   | 0.466                                                | 0.366                                                | 0.434                                                | 0.352                                           |
| $P_s/\mu\text{C}(\text{cm})^{-2}$ | 88.2                    | 81.4                                                 | 66.0                                                 | 77.5                                                 | 64.4                                            |
| $T_c/^\circ\text{C}$              | 600                     | 500                                                  | 350                                                  | 475                                                  | 300                                             |
| $\text{CTE}/^\circ\text{C}^{-1}$  | $-4.18 \times 10^{-5}$  | $-5.11 \times 10^{-5}$                               | $-1.23 \times 10^{-5}$                               | $-6.42 \times 10^{-5}$                               | $-2.08 \times 10^{-5}$                          |
| $\omega_s/\%$                     | 4.84                    | 4.52                                                 | 1.91                                                 | 4.38                                                 | 1.82                                            |

**Table. S2** Refined structure parameters of  $0.5\text{PT}-0.5\text{B}_{1-x}(\text{N/S})_x\text{F}$ ,  $x = 0, 0.1, \text{ and } 0.2$ .

|                            | <b>0.5PT-<br/>0.5BF</b> | <b>0.5PT-<br/>0.5B<sub>0.9</sub>N<sub>0.1</sub>F</b> | <b>0.5PT-<br/>0.5B<sub>0.8</sub>N<sub>0.2</sub>F</b> | <b>0.5PT-<br/>0.5B<sub>0.9</sub>S<sub>0.1</sub>F</b> | <b>0.5PT-0.5B<sub>0.8</sub>S<sub>0.2</sub>F</b> |
|----------------------------|-------------------------|------------------------------------------------------|------------------------------------------------------|------------------------------------------------------|-------------------------------------------------|
| $Z_{\text{Pb/Bi/(Nd/Sm)}}$ | 0                       | 0                                                    | 0                                                    | 0                                                    | 0                                               |
| $Z_{\text{Ti/Fe}}$         | 0.5364                  | 0.5447                                               | 0.5375                                               | 0.5479                                               | 0.5398                                          |
| $Z_{\text{O(I)}}$          | 0.1469                  | 0.1482                                               | 0.1208                                               | 0.1418                                               | 0.1196                                          |
| $Z_{\text{O(II)}}$         | 0.6625                  | 0.6548                                               | 0.6298                                               | 0.6508                                               | 0.6285                                          |
| $R_p$                      | 3.61                    | 4.08                                                 | 3.67                                                 | 3.71                                                 | 3.55                                            |
| $R_{\text{wp}}$            | 4.98                    | 5.52                                                 | 4.75                                                 | 4.87                                                 | 4.72                                            |
| $\chi^2$                   | 5.03                    | 4.47                                                 | 4.15                                                 | 3.25                                                 | 4.43                                            |

**Table. S3.** Fitting results of  $A_1(1\text{TO})$ ,  $A_1(2\text{TO})$ , and  $A_1(3\text{TO})$  peaks. For comparison,  $P_s$  was listed in the last column.

|                                                 | $A_1(1\text{TO})$ (cm <sup>-1</sup> ) | $A_1(2\text{TO})$ (cm <sup>-1</sup> ) | $A_1(3\text{TO})$ (cm <sup>-1</sup> ) | $P_s/\mu\text{C}(\text{cm})^{-2}$ |
|-------------------------------------------------|---------------------------------------|---------------------------------------|---------------------------------------|-----------------------------------|
| <b>0.5PT-0.5BF</b>                              | 201.0                                 | 359.9                                 | 690.1                                 | 88.2                              |
| <b>0.5PT-0.5B<sub>0.9</sub>S<sub>0.1</sub>F</b> | 199.2                                 | 359.3                                 | 687.4                                 | 77.5                              |
| <b>0.5PT-0.5B<sub>0.8</sub>S<sub>0.2</sub>F</b> | 190.4                                 | 355.4                                 | 674.3                                 | 64.4                              |
| <b>0.5PT-0.5B<sub>0.9</sub>N<sub>0.1</sub>F</b> | 198.3                                 | 359.2                                 | 687.4                                 | 81.4                              |
| <b>0.5PT-0.5B<sub>0.8</sub>N<sub>0.2</sub>F</b> | 189.4                                 | 355.6                                 | 678.9                                 | 66.0                              |
